# Supplementary figures and images for: Controlled in situ acidification enables the 3D printability of GelMA–dextran aqueous two-phase hydrogel with unique interconnected porosity
Source: Royal Society of Chemistry journal article supplement (doi:10.1039/d5lp00212e), 2025-11-04

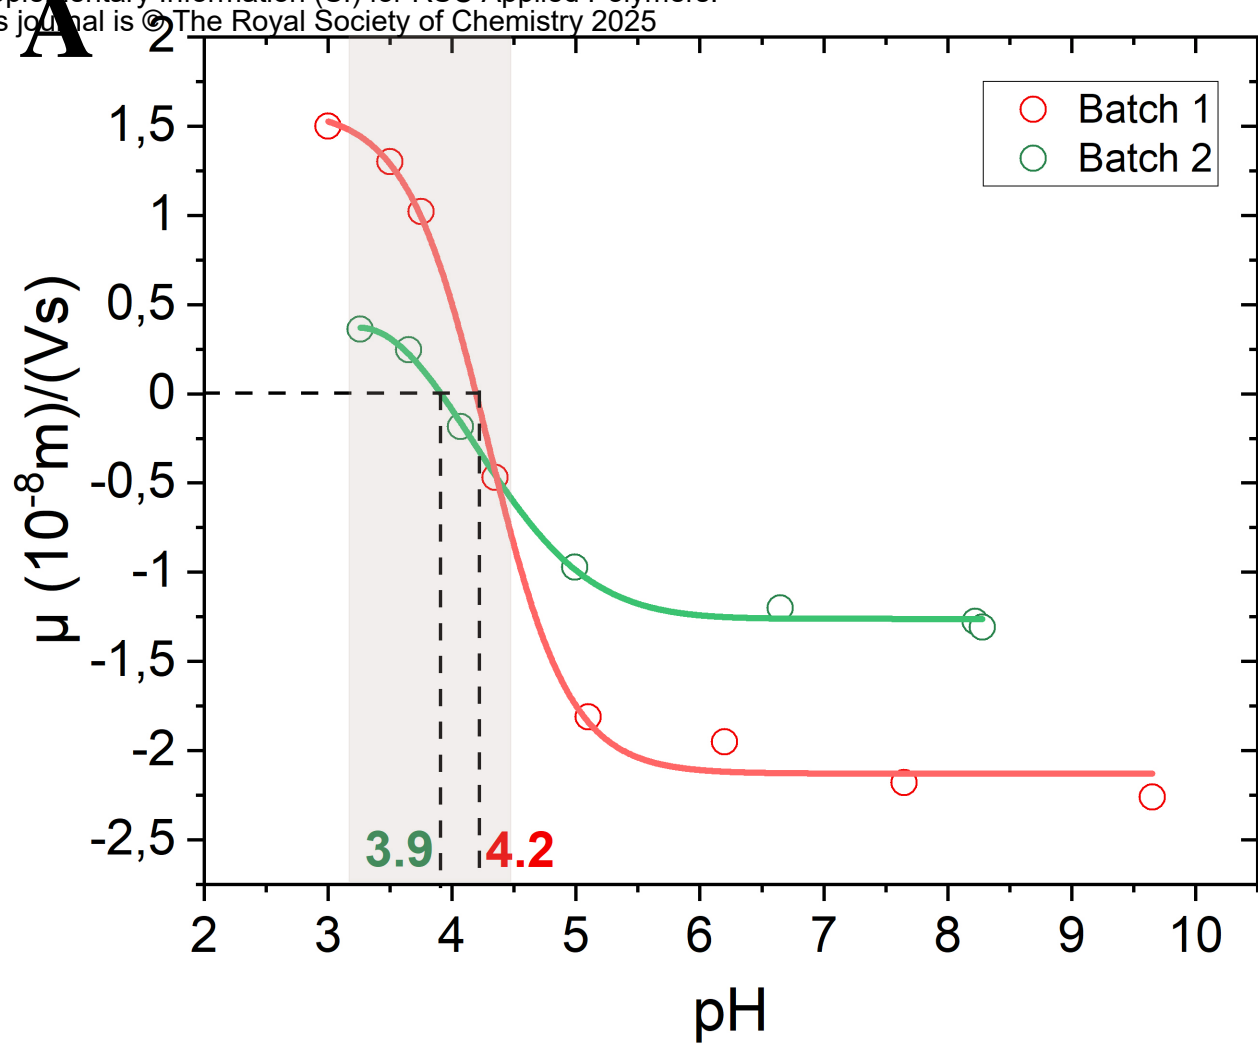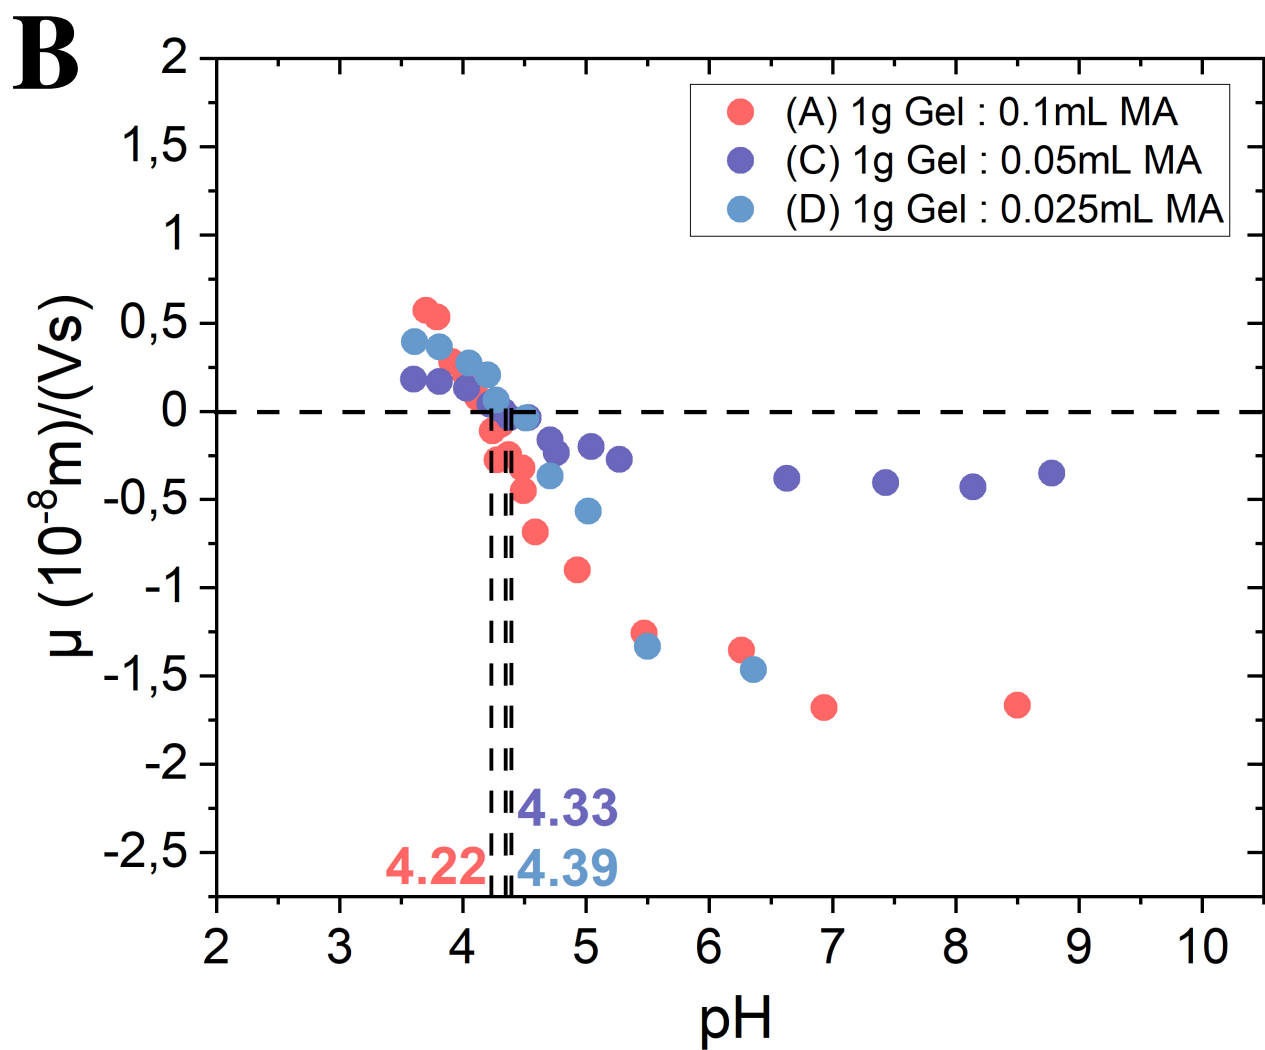

Supplement: d5lp00212e1.pdf [file d5lp00212e1.pdf]

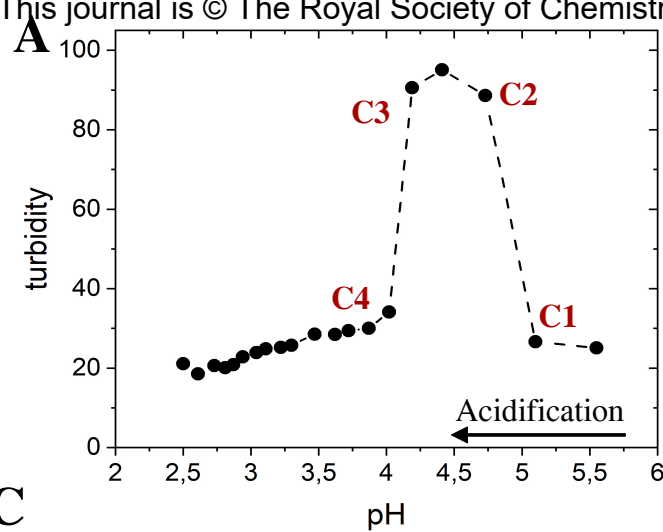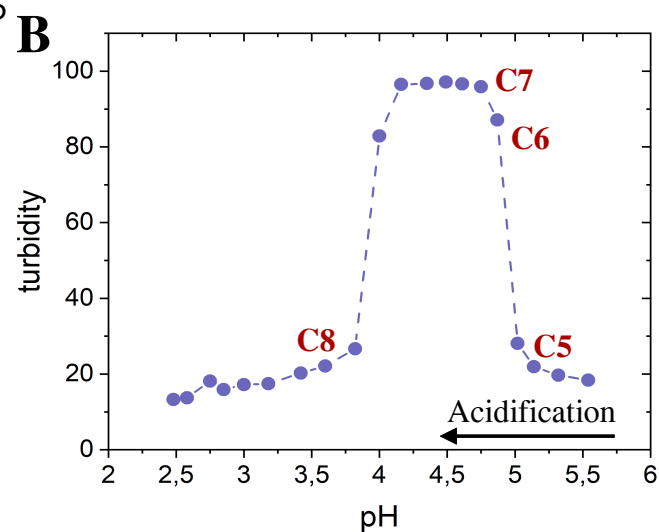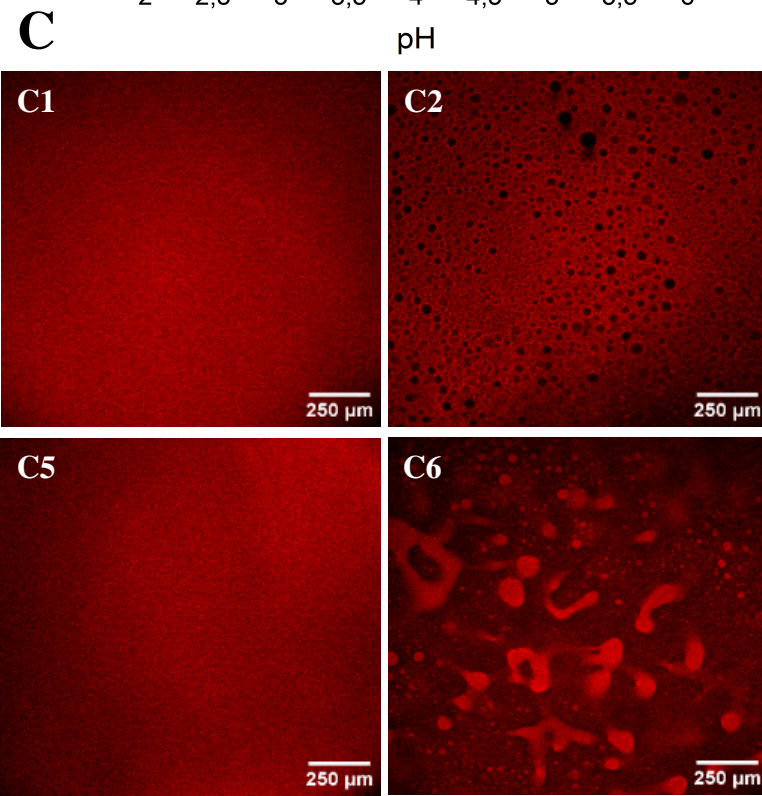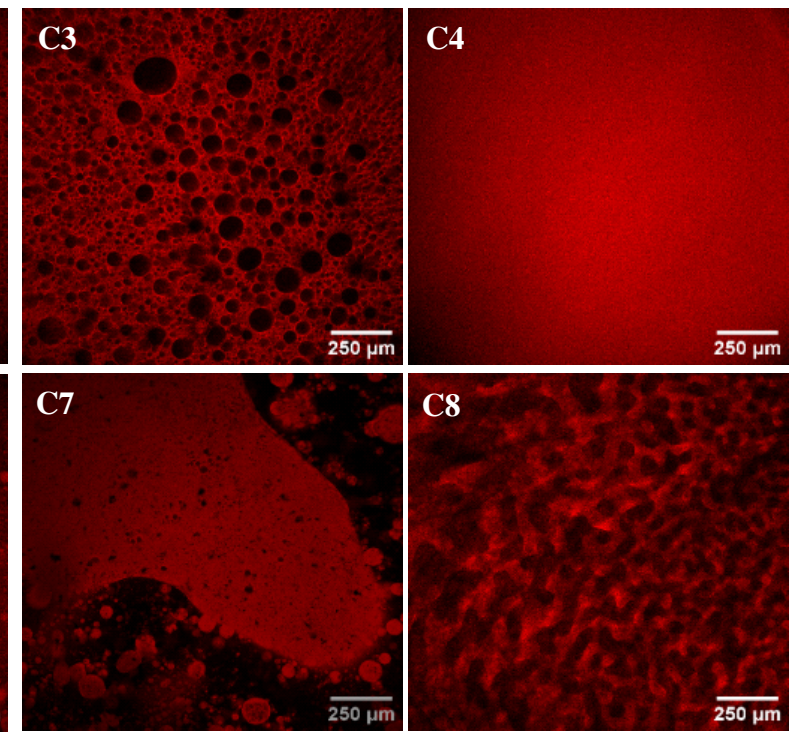

Supplement: d5lp00212e4.pdf [file d5lp00212e4.pdf]

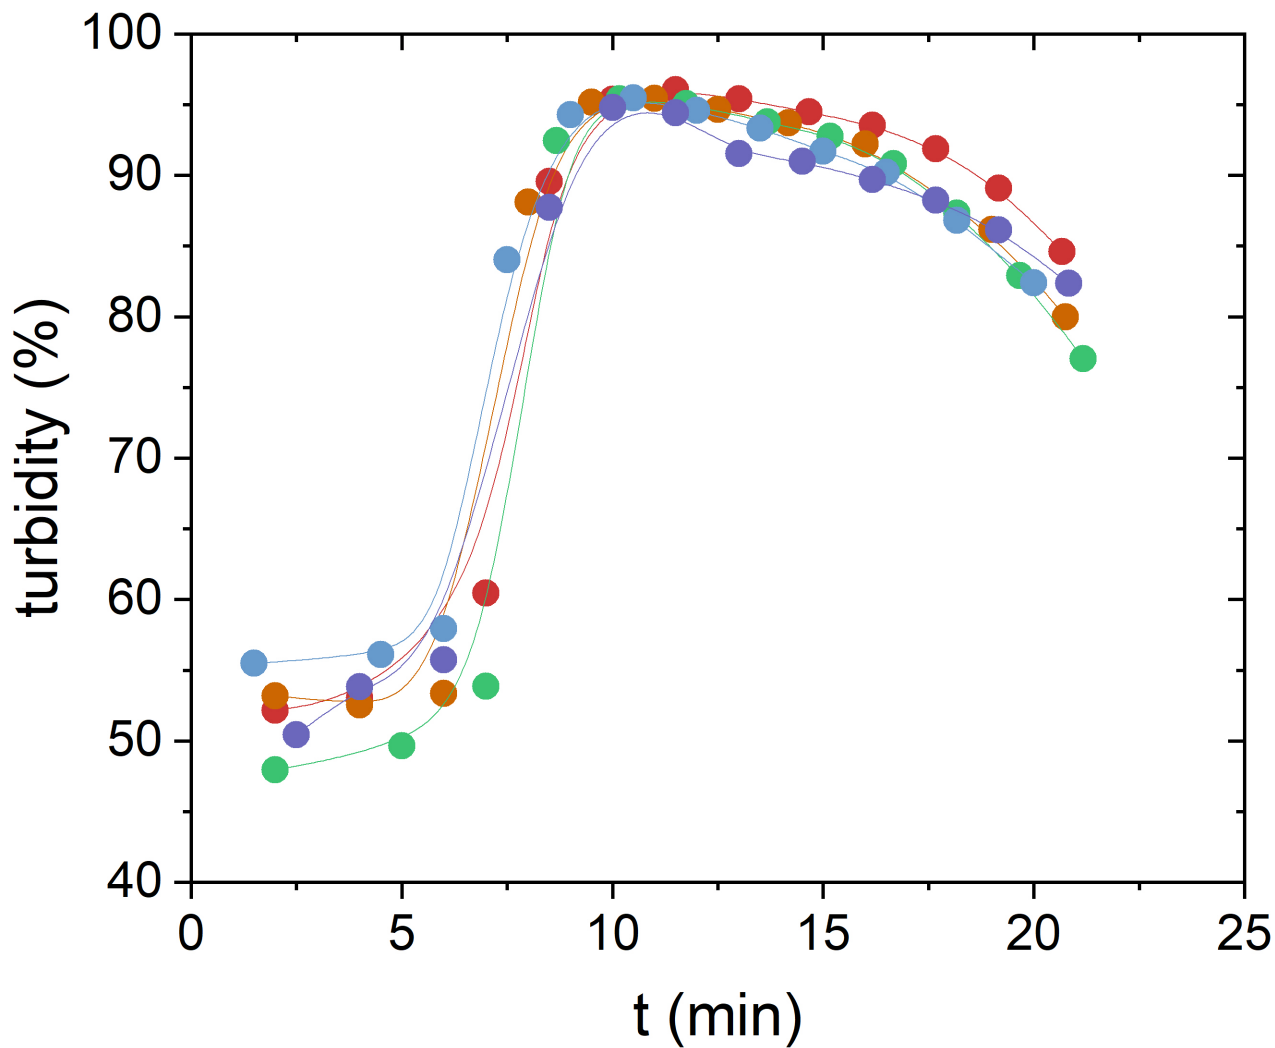

Supplement: d5lp00212e5.pdf [file d5lp00212e5.pdf]

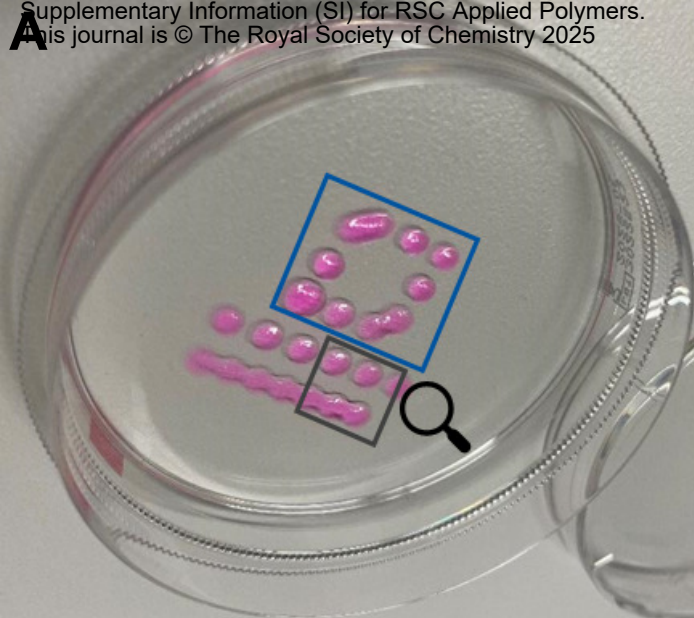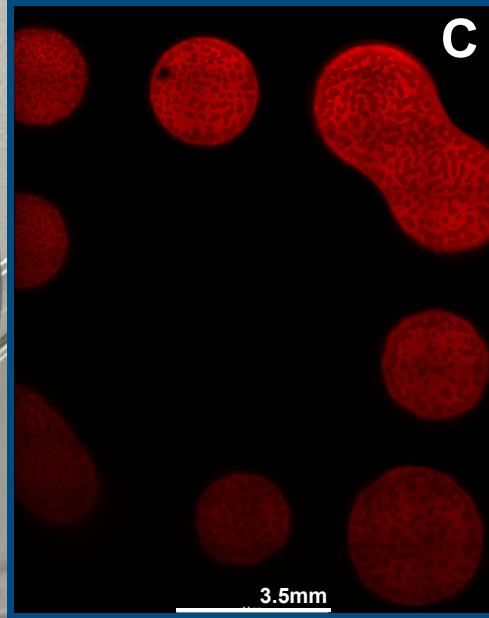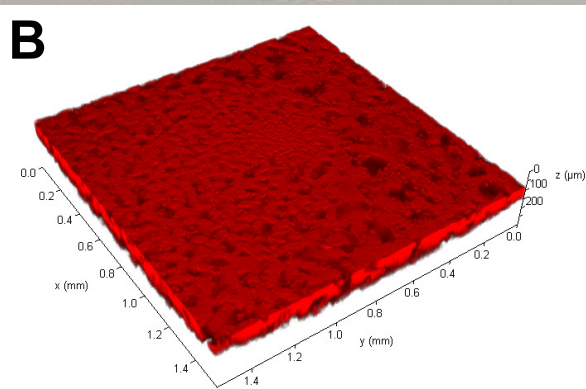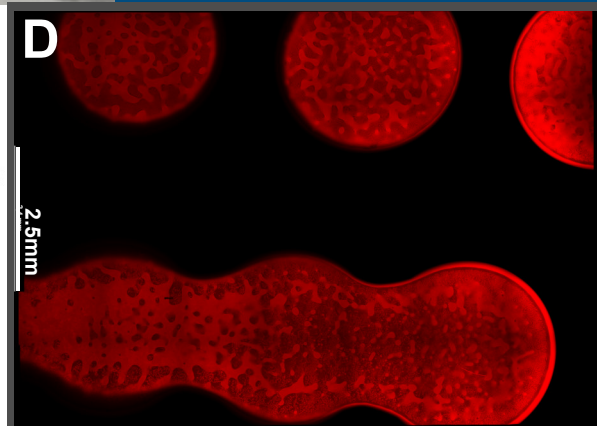

Supplement: d5lp00212e6.pdf [file d5lp00212e6.pdf]

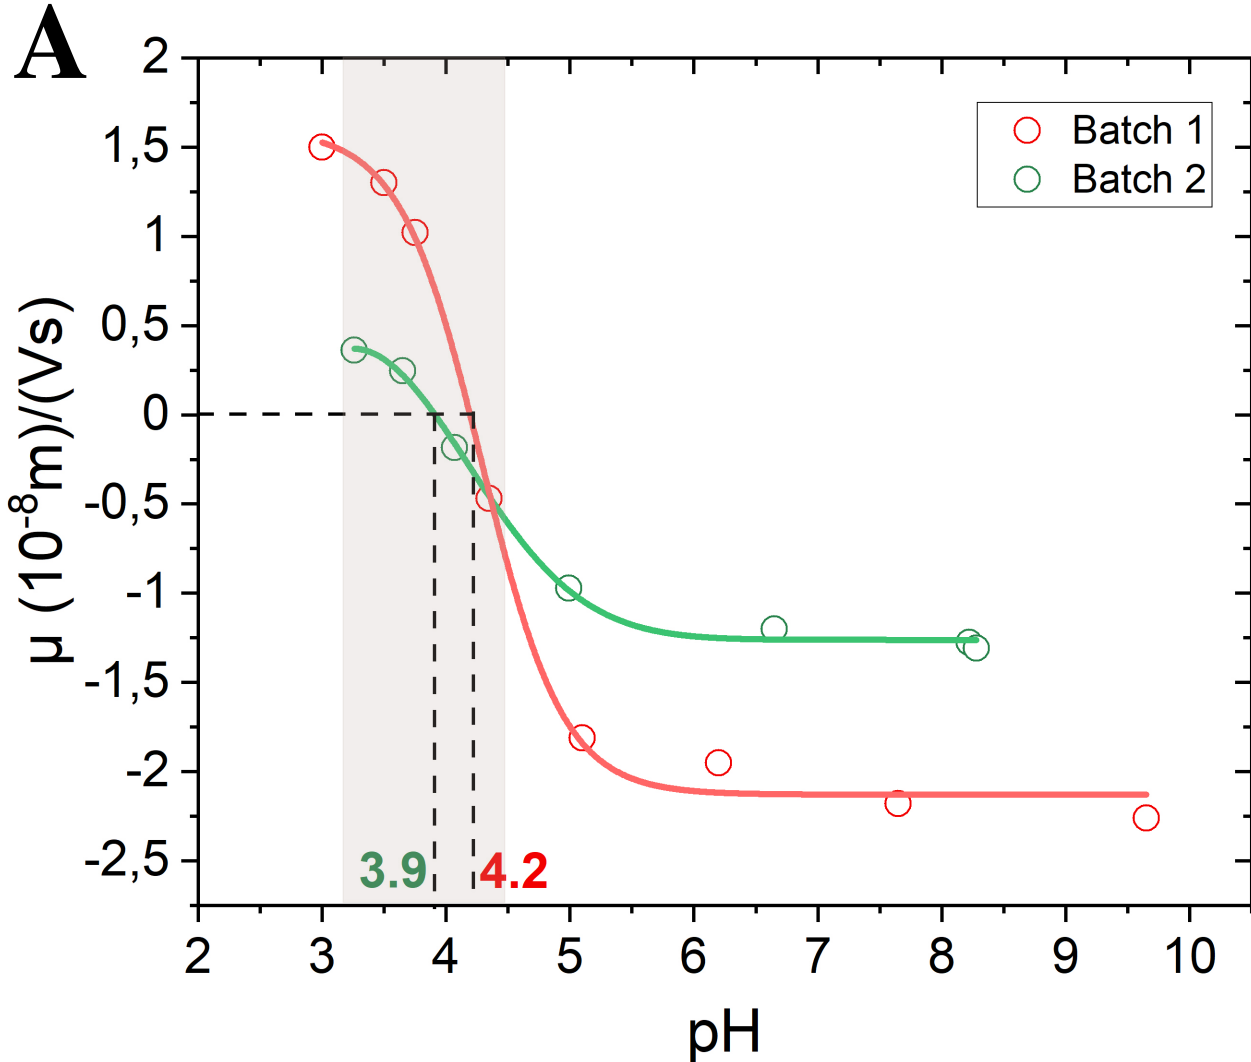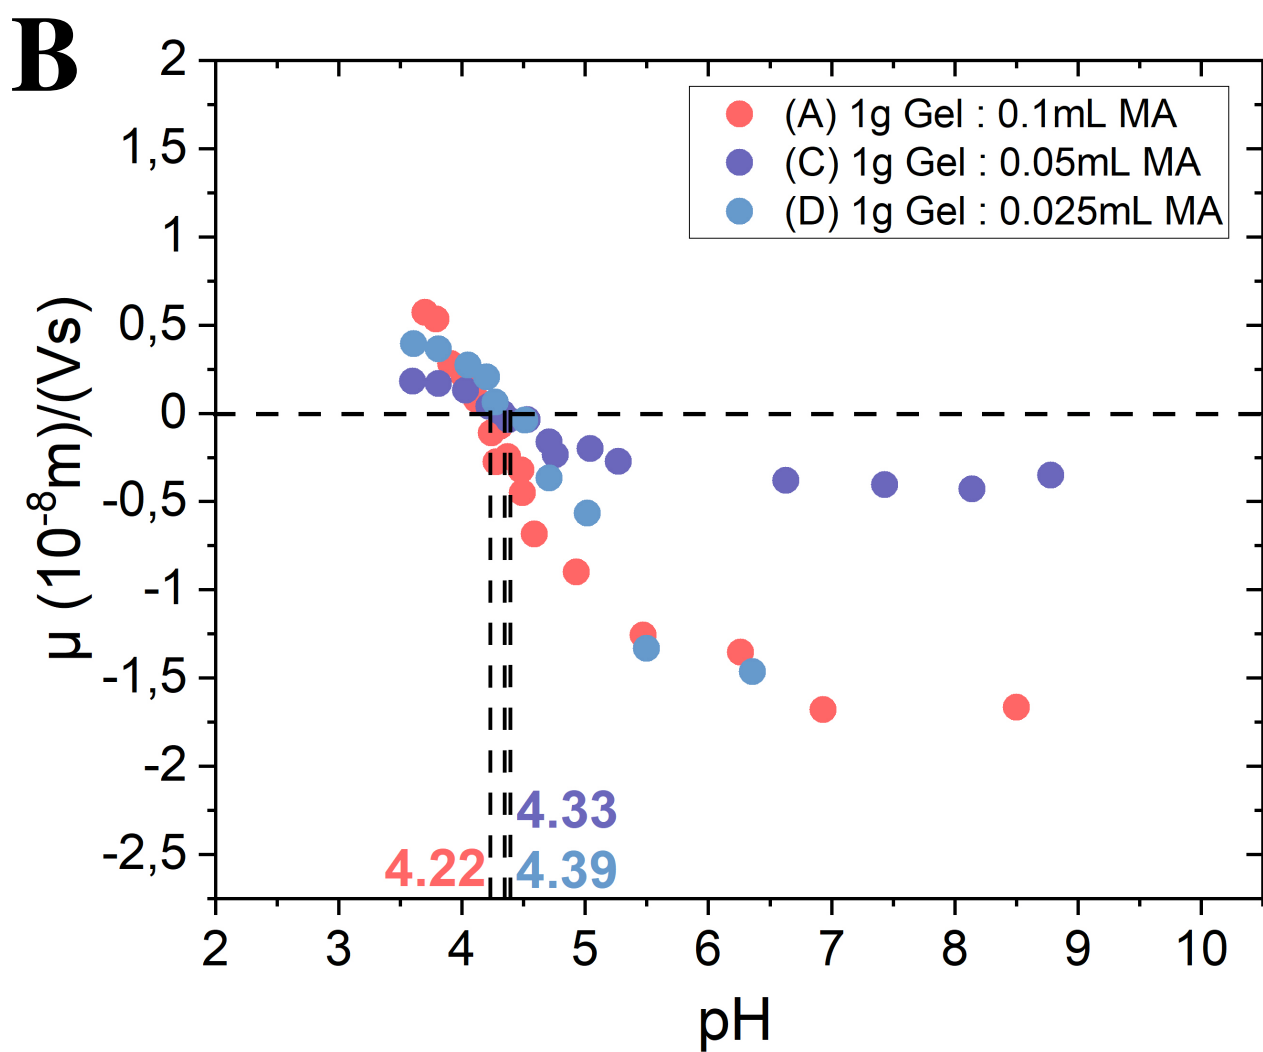

Supplement: d5lp00212e7.zip [file FigS1GelMAB1B2B3B4IEPonePlot.pdf › SI Figures/FigS1GelMAB1B2B3B4IEPonePlot.pdf]

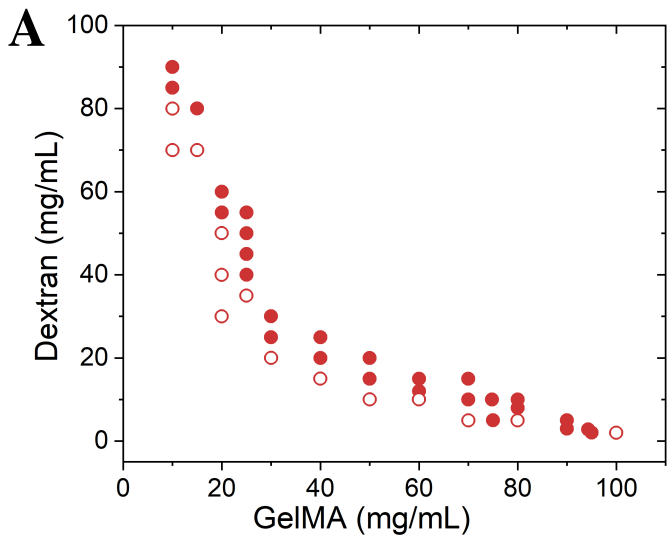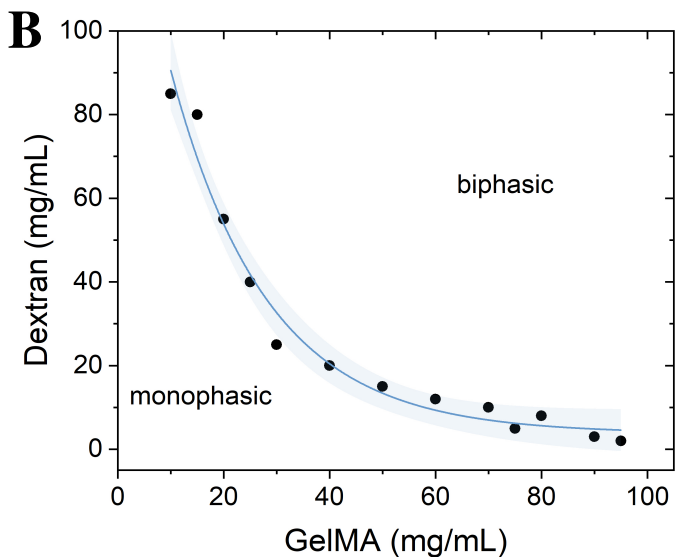

Supplement: d5lp00212e7.zip [file FigS2GelMADextranPhaseDiagram.pdf › SI Figures/FigS2GelMADextranPhaseDiagram.pdf]

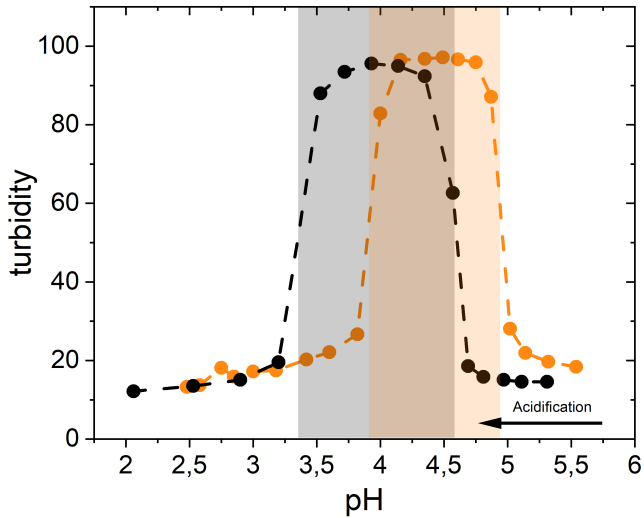

Supplement: d5lp00212e7.zip [file FigS3UVvisHCLvsGLUCONICbic.pdf › SI Figures/FigS3UVvisHCLvsGLUCONICbic.pdf]

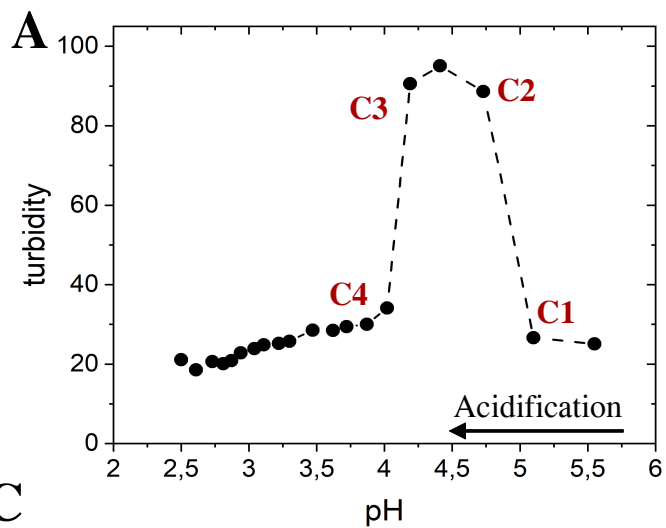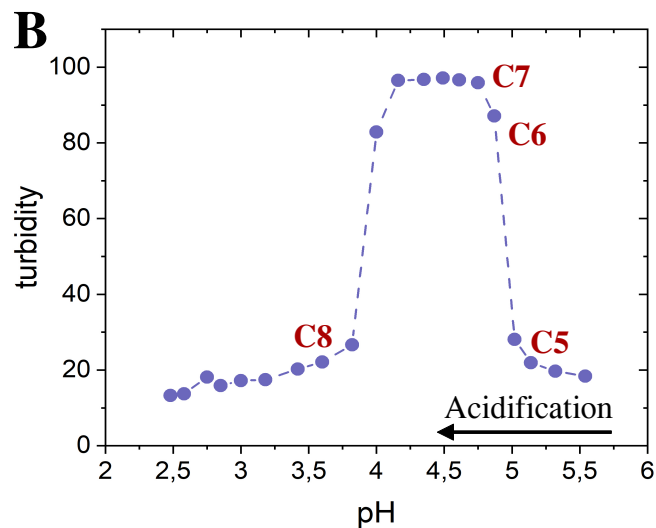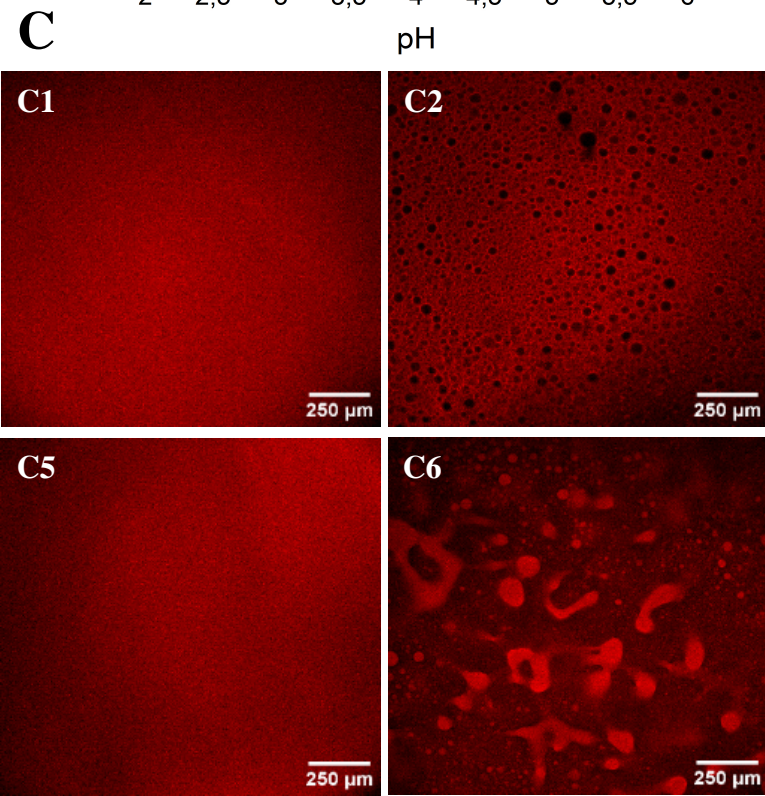

Supplement: d5lp00212e7.zip [file FigS4TurbidityAsymmetryGluconicAcid.pdf › SI Figures/FigS4TurbidityAsymmetryGluconicAcid.pdf]

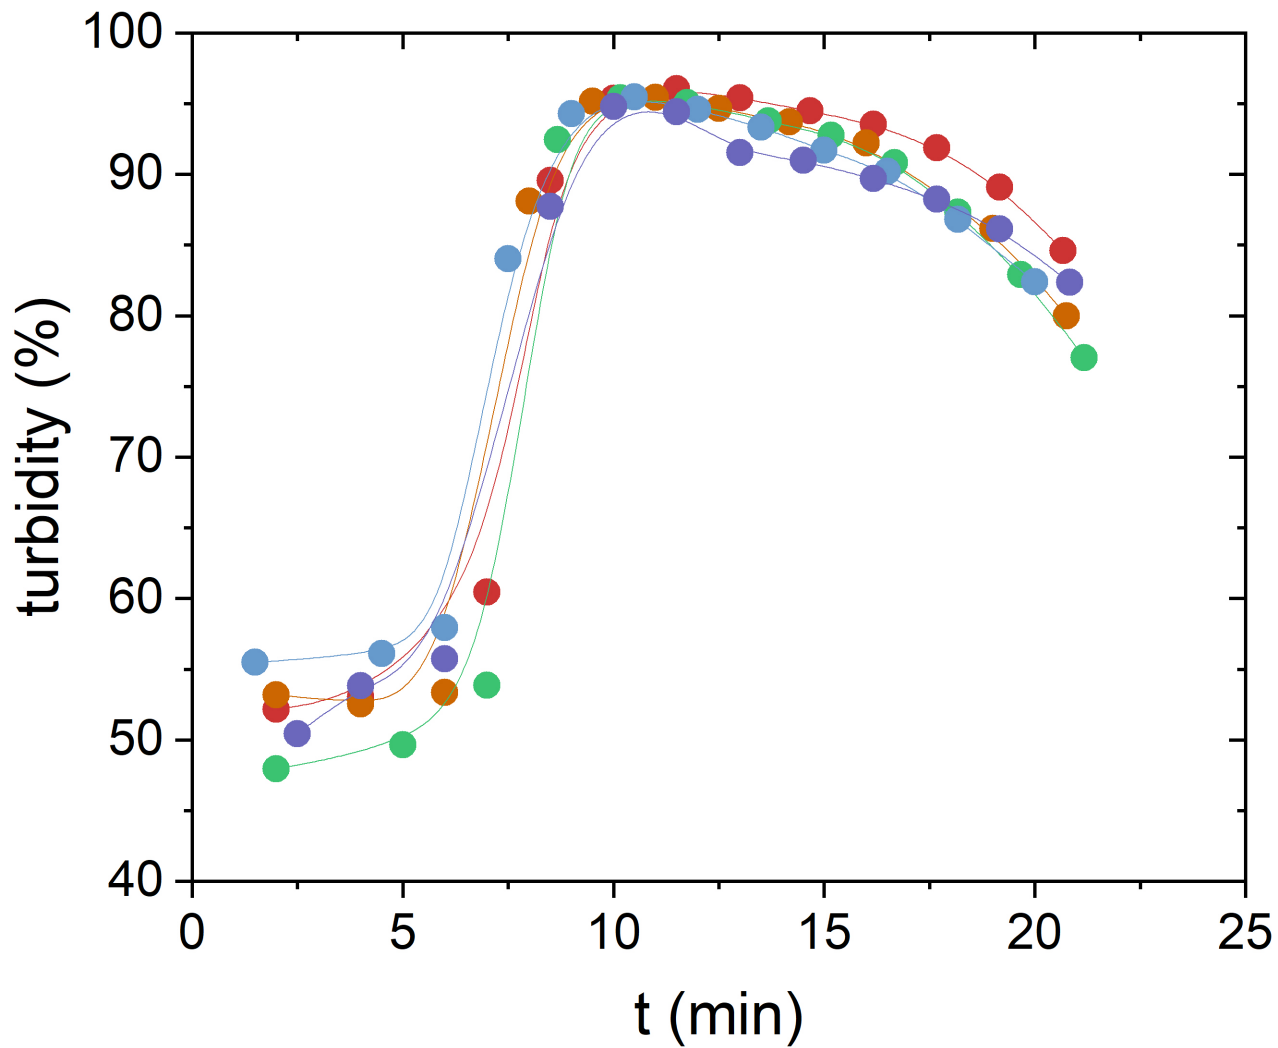

Supplement: d5lp00212e7.zip [file FigS5LagTimesReproducibility.pdf › SI Figures/FigS5LagTimesReproducibility.pdf]

**A**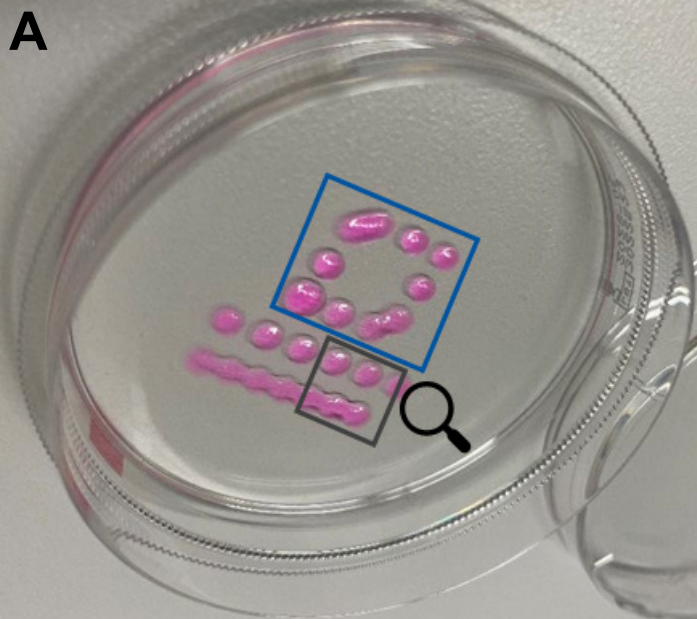**C**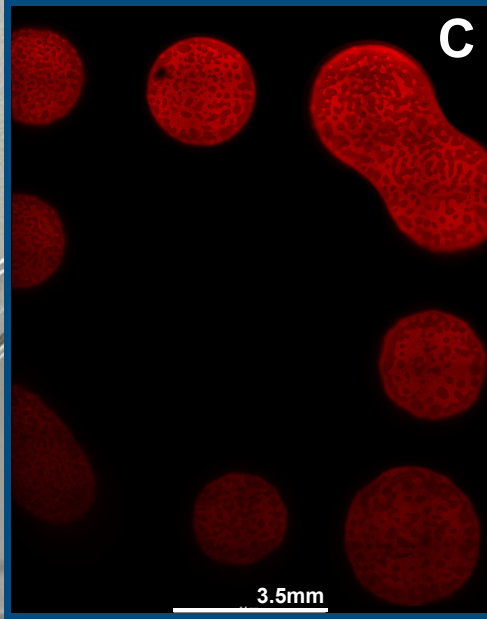**B**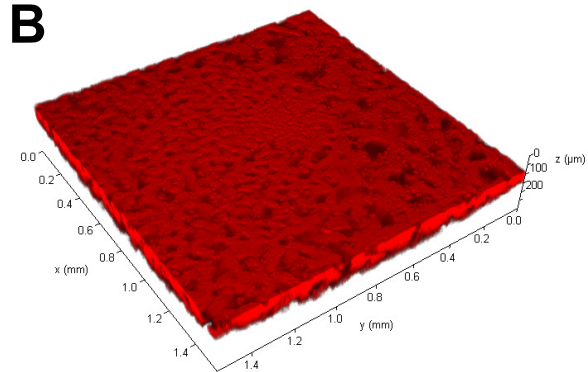**D**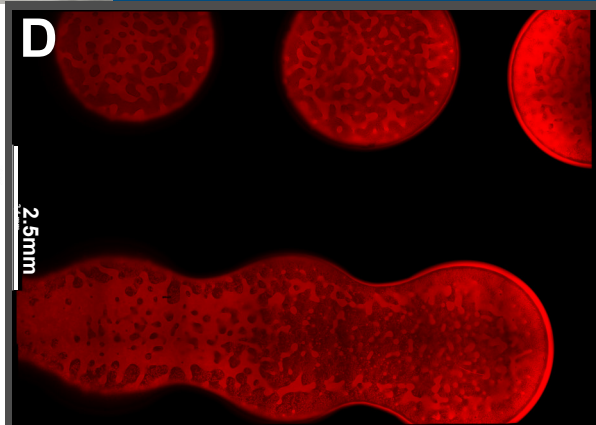

Supplement: d5lp00212e7.zip [file FigS6macroscopicIJPcompressed.pdf › SI Figures/FigS6macroscopicIJPcompressed.pdf]
